# Supplementary material
Source: PubMed Central journal article supplement (PMC3121396)
Supplement: supp_M110.217315_Supplemental_information_final.pdf [file supp_M110.217315_Supplemental_information_final.pdf]

**Table S1 Primers used for cloning components of *CtXyl5A* and for constructing mutants**

| <b>Protein</b>    | <b>Primers</b>     | <b>Sequence (5'-3')</b>                                                            |
|-------------------|--------------------|------------------------------------------------------------------------------------|
| <i>CtGH5</i>      | Forward<br>Reverse | CTCGCTAGCAGCCCGCAACGTGGCCGG<br>CACCTCGAGGTCATAATACGAAACCCC                         |
| <i>CtGH5-CBM6</i> | Forward<br>Reverse | CTCGCTAGCCCGCAACGTGGCCGG<br>CACCTCGAGTATCGGAGAAAGTTC                               |
| <i>CtCBM6</i>     | Forward<br>Reverse | CTCGCTAGCACGGATTCGGTGAATG<br>CACCTCGAGTATCGGAGAAAGTTC                              |
| E171              | Forward<br>Reverse | TTGTATGAAATACACAATGCGCCTGTGGCATGGGGA<br>TCCCCATGCCACAGGCGCATTGTGTATTTCATACAA       |
| E279              | Forward<br>Reverse | CCTGCTTTATGACTGCGTATGCCGGAGGTGC<br>GCACCTCCGGCATAACGCAGTCATAAAGCAGG                |
| W242A             | Forward<br>Reverse | GGCGGTTACAATGTTCGGAGCGATTTCCGGAAGGAGAATC<br>CATTCTCCTTCCGAAATCGCTCCGACATTGTAACCGCC |
| W242A             | Forward<br>Reverse | CTGCCTGCTACCGGAGGTGCTCAGACTTGGATACA<br>TGTAGTCCAAGTCTGAGCACCTCCGGTAGCAGGCAG        |

**Table S2 Crystal and structure resolution statistics**

|                                                       | <i>CtGH5-CBM6</i><br>SeMet                    | <i>CtGH5-CBM6</i><br>Wt native                |
|-------------------------------------------------------|-----------------------------------------------|-----------------------------------------------|
| <b>Data collection</b>                                |                                               |                                               |
| Space group                                           | P2 <sub>1</sub> 2 <sub>1</sub> 2 <sub>1</sub> | P2 <sub>1</sub> 2 <sub>1</sub> 2 <sub>1</sub> |
| Cell dimensions<br><i>a</i> , <i>b</i> , <i>c</i> (Å) | 69.26, 75.82,<br>106.11                       | 69.12, 75.55,<br>105.97                       |
| Resolution (Å)                                        | 61.66-2.20 (2.32-<br>2.20)                    | 36.74-1.47 (1.55-<br>1.47)                    |
| <i>R</i> <sub>merge</sub>                             | 0.098(0.372)                                  | 0.081 (0.639)                                 |
| <i>I</i> / $\sigma I$                                 | 16.9 (5.8)                                    | 13.9 (2.8)                                    |
| Completeness (%)                                      | 99.0 (98.3)                                   | 100 (99.9)                                    |
| Redundancy                                            | 7.2 (7.4)                                     | 7.0 (6.6)                                     |
| Anomalous<br>completeness (%)                         | 99.2 (98.5)                                   |                                               |
| Anomalous<br>redundancy                               | 3.8 (3.8)                                     |                                               |
| <b>Refinement</b>                                     |                                               |                                               |
| No. reflections                                       | -                                             | 90100 (4744)                                  |
| <i>R</i> <sub>work</sub> / <i>R</i> <sub>free</sub>   | -                                             | 0.146 / 0.166                                 |
| No. Atoms                                             |                                               |                                               |
| Protein                                               | -                                             | 3782                                          |
| Ligand / Ion                                          | -                                             | 41                                            |
| Water                                                 | -                                             | 636                                           |
| <i>B</i> -factor                                      |                                               |                                               |
| Protein                                               | -                                             | 16                                            |
| Ligand / Ion                                          | -                                             | 32                                            |
| Water                                                 | -                                             | 33                                            |
| R.m.s. <sup>b</sup> deviations                        |                                               |                                               |
| Bond lengths (Å)                                      |                                               | 0.014                                         |
| Bond angles (°)                                       |                                               | 1.40                                          |

**Table S3 <sup>1</sup>H and <sup>13</sup>C chemical shifts of the NMR resonances of Fraction 1**

| <b>Sugar residues</b>              | <b>H-1/C-1</b> | <b>H-2/C-2</b> | <b>H-3/C-3</b> | <b>H-4/C-4</b> | <b>H-5/C-5<sup>a</sup></b> | <b>H-5'/C-5<sup>a</sup></b> |
|------------------------------------|----------------|----------------|----------------|----------------|----------------------------|-----------------------------|
| β-D-Xylp                           | 4.618          | 3.392          | 3.736          | 3.809          | 4.073                      | 3.387                       |
| (reducing)                         | 96.6           | 74.8           | 77.8           | 73.8           | 63.0                       |                             |
| α-D-Xylp                           | 5.169          | 3.680          | 3.906          | nd             | 3.840                      | 3.770                       |
| (reducing)                         | 92.4           | 71.8           | 77.7           |                | 59.4                       |                             |
| α-L-Araf (α)                       | 5.342          | 4.164          | 3.911          | 4.273          | 3.799                      | 3.718                       |
|                                    | 107.9          | 80.8           |                | 84.9           | 61.5                       |                             |
| α-L-Araf (β)                       | 5.391          | 4.169          | 3.911          | 4.283          | 3.799                      | 3.718                       |
|                                    | 107.9          | 80.8           |                | 84.9           | 61.5                       |                             |
| α-L-Araf<br>(nonreducing)          | 5.327          | 4.181          | 3.961          | 4.182          | 3.815                      | 3.706                       |
|                                    | 108.4          | 80.8           |                | 84.1           | 61.5                       |                             |
| 3-linked-β-D-Xylp<br>(nonreducing) | 4.465          | 3.401          | nd             | nd             | nd                         | nd                          |
|                                    | 101.7          | 75.3           |                |                |                            |                             |
| 4-linked-β-D-Xylp<br>(nonreducing) | 4.453          | 3.280          | 3.54           | 3.761          | nd                         | nd                          |
|                                    | 101.7          | 73.0           | 73.8           | 76.5           |                            |                             |
| terminal-β-D-Xylp<br>(nonreducing) | 4.438          | 3.241          | 3.42           | 3.597          | nd                         | nd                          |
|                                    | 101.7          | 73.0           | 75.8           | 69.3           |                            |                             |

a. The axial proton on C5 of Xylp residues is designated H5 and the equatorial proton is designated H5'. The stereochemistry (*pro-R* vs. *pro-S*) of H5 and H5' of Araf residues is not specified.

## SUPPLEMENTAL INFORMATION

### **Figure S1 ESI-MS of the pentasaccharides in Fraction 1**

The pentasaccharides in Fraction 1 were analyzed by ESI-MS<sup>n</sup>. *Panel A* shows the fragmentation of the  $m/z$  725 ion which comprises the pentasaccharides. *Panel B, C, D, E* and *F* show the fragmentation patterns of the 711 (MS<sup>3</sup>), 537 (MS<sup>4</sup>), 391 (MS<sup>5</sup>), 377 (MS<sup>5</sup>) and 363 (MS<sup>5</sup>) ions, respectively. The masses of Y-ions are indicated unless otherwise stated.

### **Figure S2 The structure of the pentasaccharides generated by CtXyl5A**

Based on the data displayed in **Figure S1**, the structures of the pentasaccharides in Fraction 1 were identified. The sugars labelled P can be *Araf* or *Xylp*. The dotted arrow between sugar linkages shows the fragmentation site and the ion identified. Arrows pointing at sugars (but did not link two sugars together) identified hydroxyl groups that were not methylated as they comprised a glycosidic linkage in a parental ion. Xylol is the reducing end xylose that has been reduced to its alditol form by NaBH<sub>4</sub>.

### **Figure S3 ESI-MS of the trisaccharides in Fraction 1**

The trisaccharides in Fraction 1 were analyzed by ESI-MS<sup>n</sup>. *Panel A* shows the fragmentation of the  $m/z$  565 ion (MS<sup>2</sup>), which comprises the trisaccharides. *Panel B* shows the fragmentation pattern of the  $m/z$  391 ion (MS<sup>3</sup>) generated from the  $m/z$  565 ion.

### **Figure S4 The structure of the trisaccharides generated by CtXyl5A**

Based on the data displayed in **Figure S3**, the structures of the trisaccharides in Fraction 1 were identified. The sugars labelled P can be *Araf* or *Xylp*. The data showed that the oligosaccharide ions coloured green were present, while those coloured red were not evident. The solid arrows between oligosaccharides showed the conversion of one oligosaccharide into another, through ESI-MS fragmentation. Dotted arrows identified theoretical MS-mediated oligosaccharide conversions that did not occur in these analyses. The dotted arrows between sugar linkages in the oligosaccharides show the fragmentation site and the ion identified. Arrows pointing at sugars (but did not link two sugars together) within oligosaccharides identified hydroxyl groups that were not methylated as they comprised a glycosidic linkage in a parental ion. Xylol is the reducing end xylose that has been reduced to its alditol form by NaBH<sub>4</sub>.

**Figure S5 Temperature optimum of CtGH5 and CtGH5-CBM6** The two enzymes were assayed in 50 mM sodium phosphate buffer, pH 7.0, containing 50 nM enzyme and 1 mg/ml wheat arabinoxylan. The reactions were monitored for 10 min by assaying for reducing sugar release.

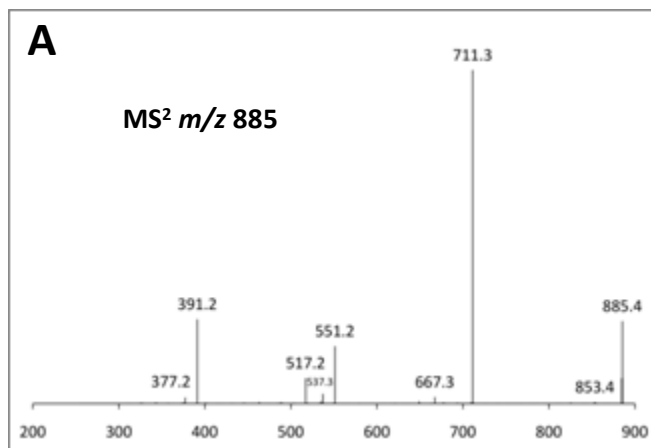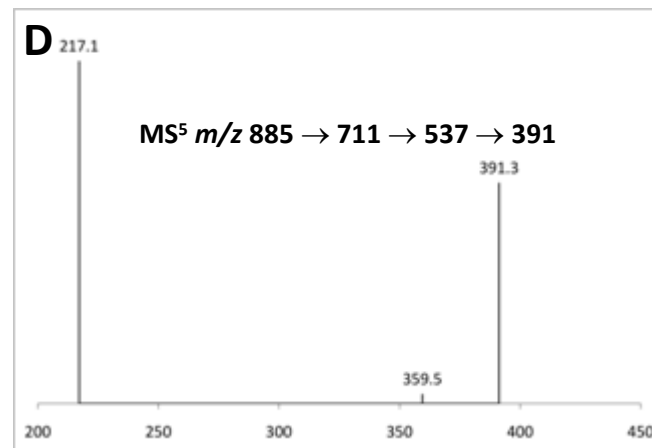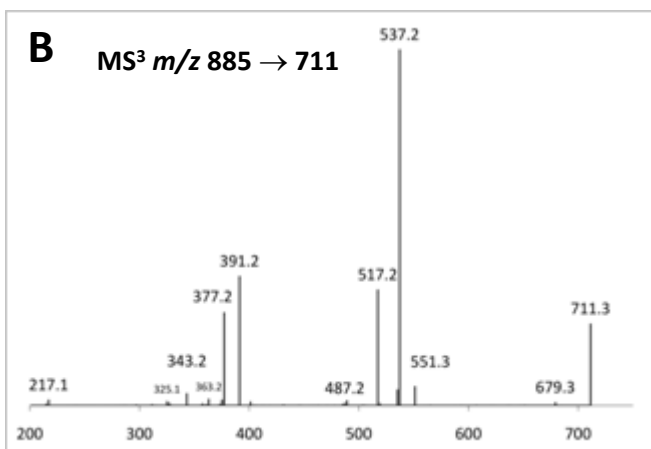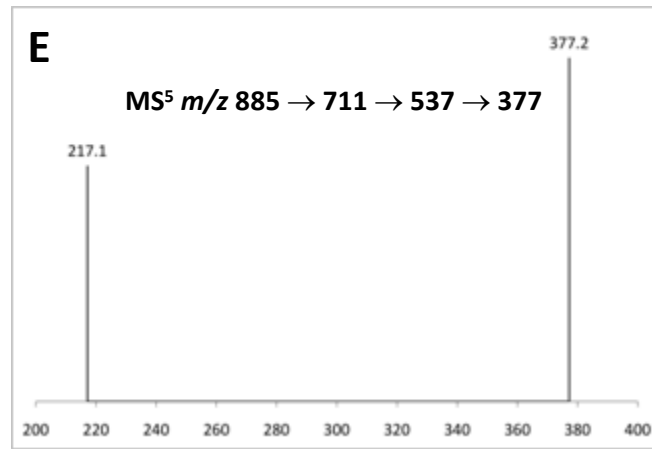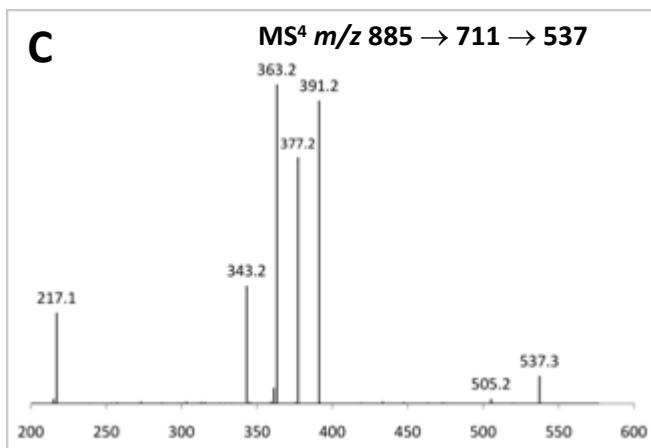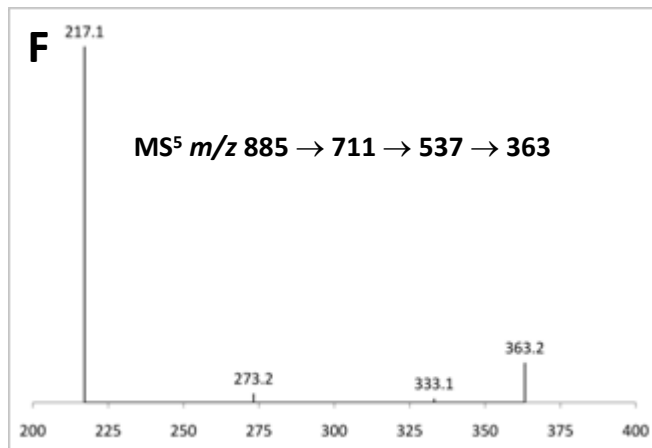

Figure S1

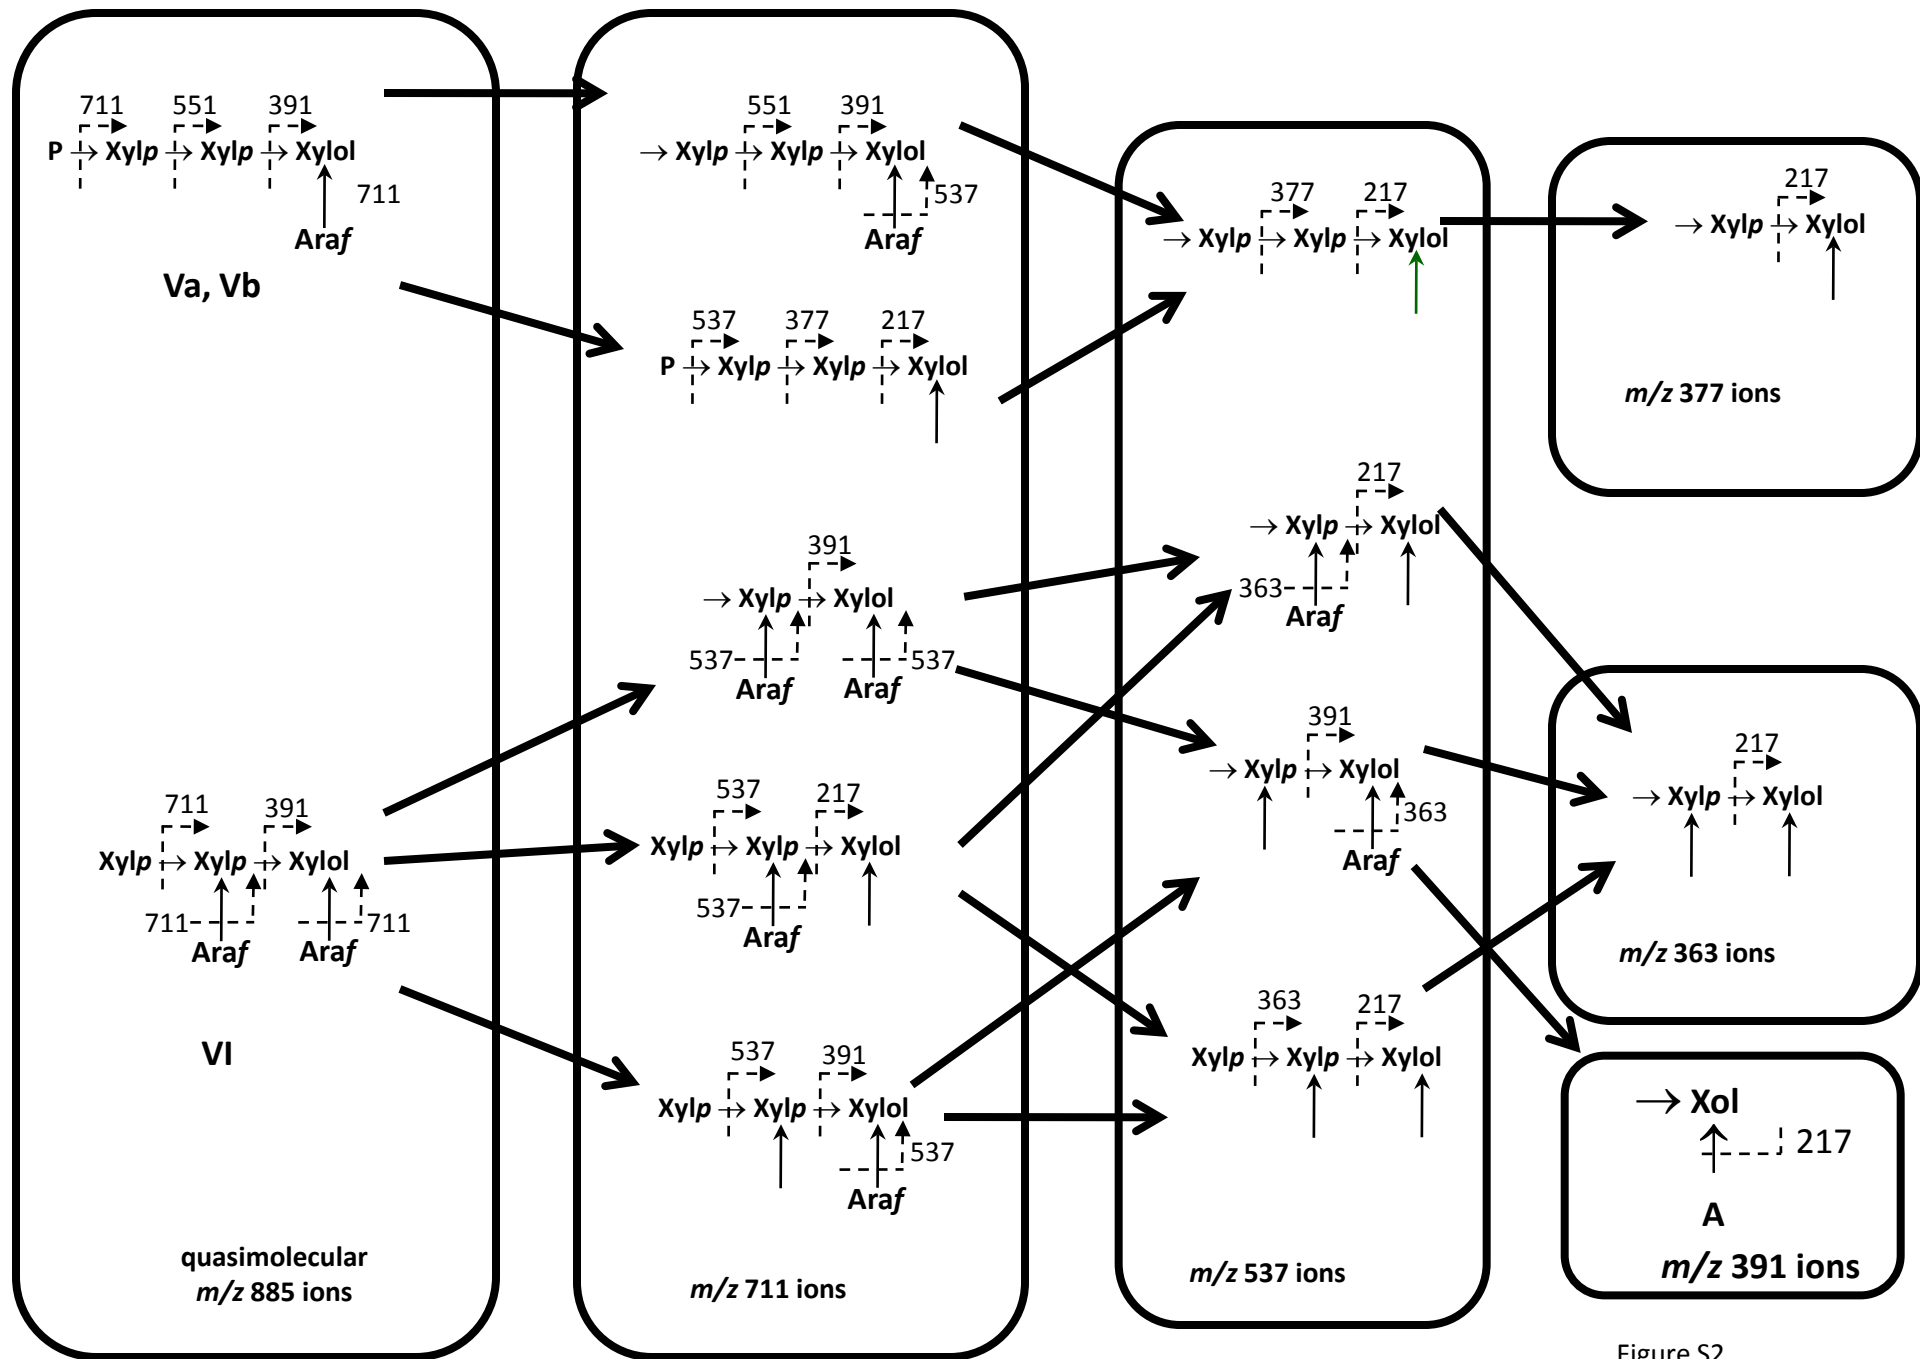

Figure S2

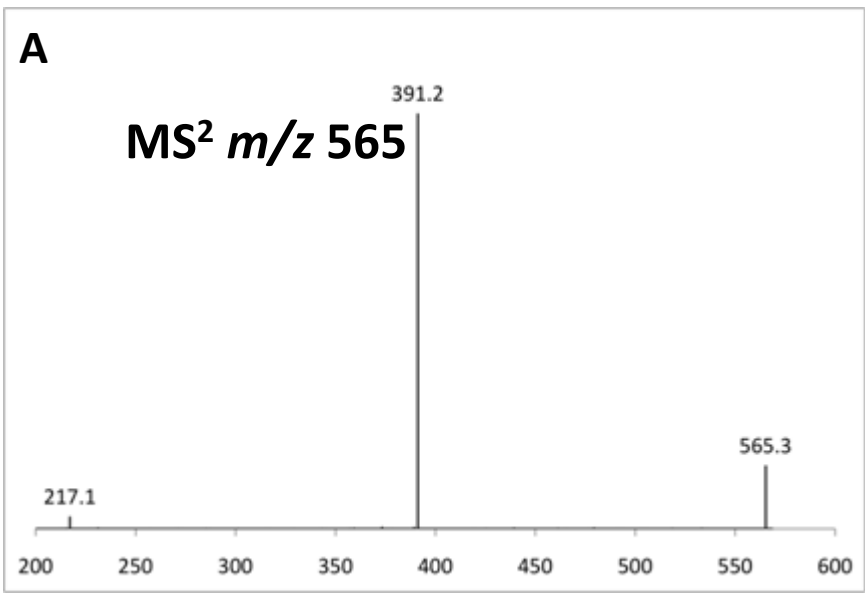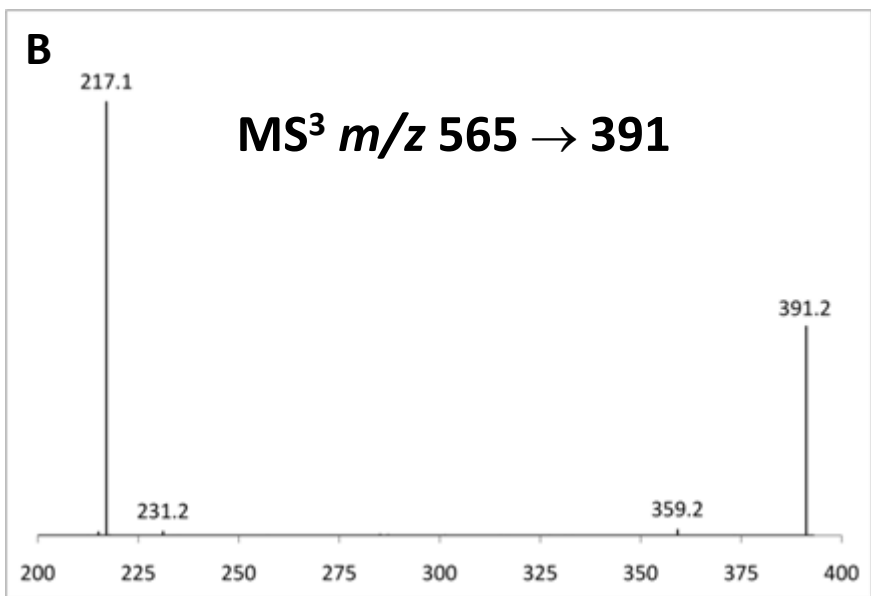

Figure S3

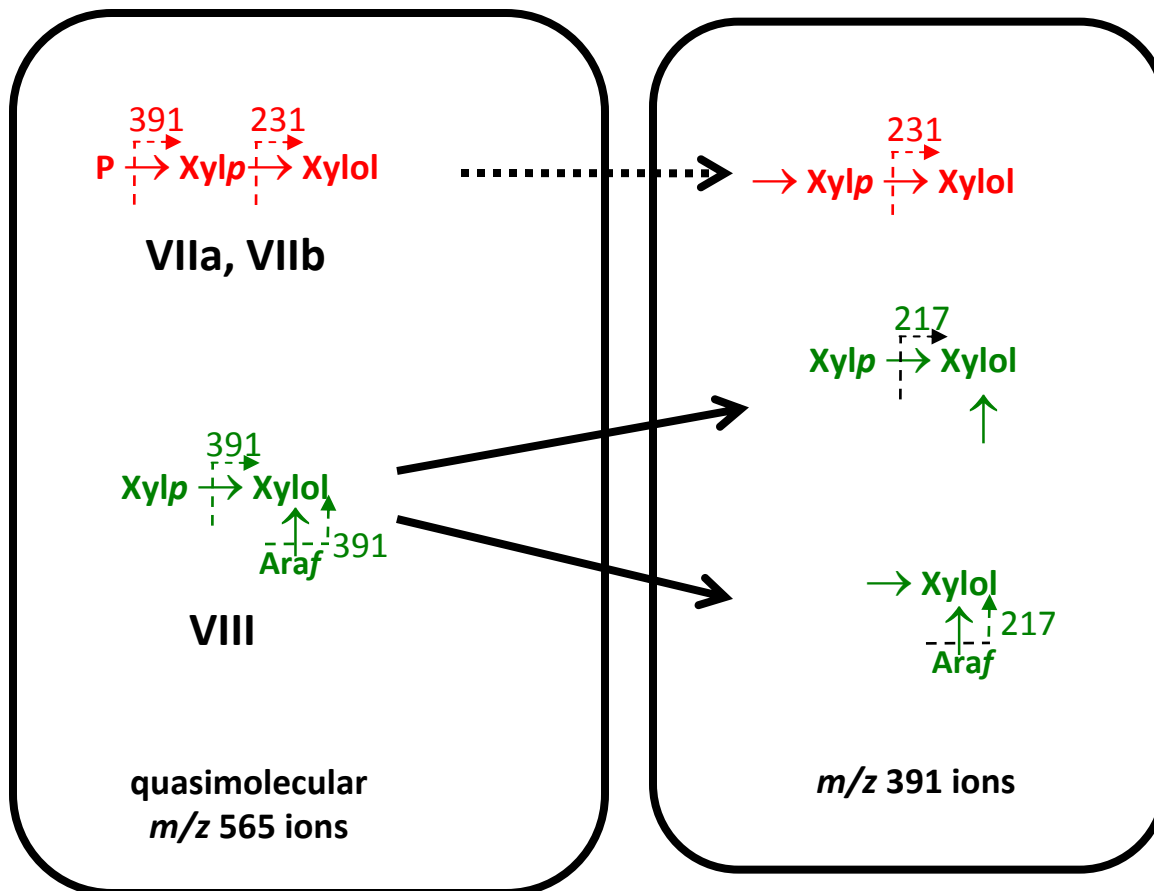

Figure S4



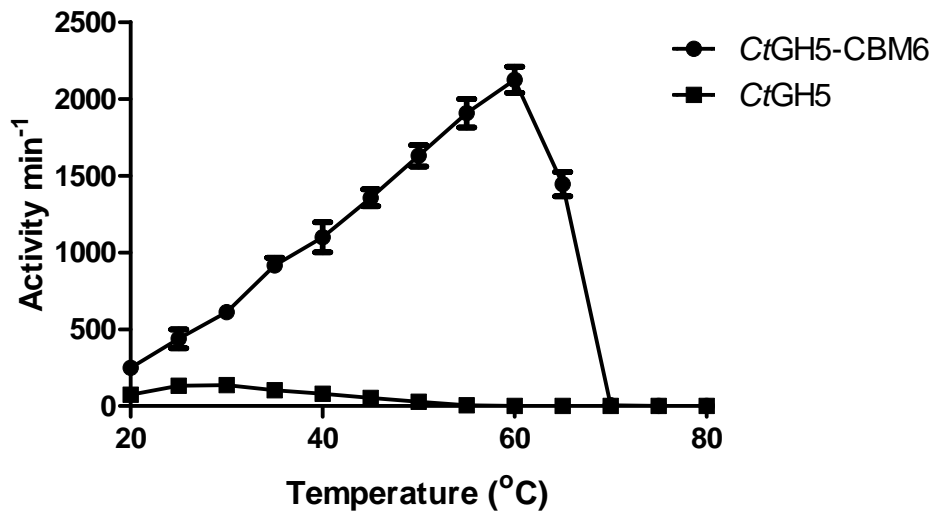

Figure S5
